# Supplementary material for: Changes in Oral Microbial Ecology of C57BL/6 Mice at Different Ages Associated with Sampling Methodology
Source: PubMed Central journal article supplement (PMC6780121; doi:10.3390/microorganisms7090283), 2019-08-22
Supplement: microorganisms-07-00283-s001.pdf [file microorganisms-07-00283-s001.pdf]

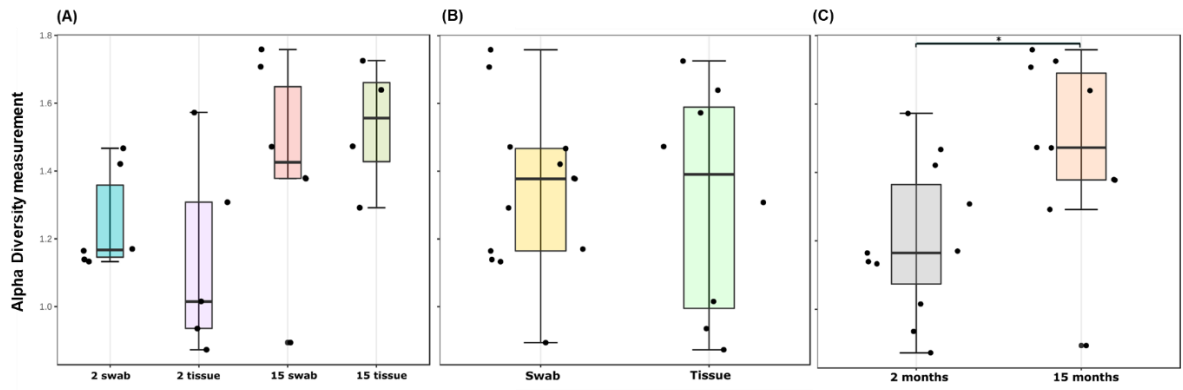

**Figure S1.** Alpha diversity calculated by Shannon's. Comparison between all groups (A), sampling methodologies (B) and age (C). Alpha diversity compared by age was statistically different (p-value >0.001), represented by (\*). Numbers before the sample type refers to the age in months.

(A)

|                               | 2_tissue n=5 |                        |          |                          |             | 2_swab n=6 |                        |          |                          |             |
|-------------------------------|--------------|------------------------|----------|--------------------------|-------------|------------|------------------------|----------|--------------------------|-------------|
|                               | Mean         | Std. Deviation of mean | Variance | 95% confidence intervals |             | Mean       | Std. Deviation of mean | Variance | 95% confidence intervals |             |
|                               |              |                        |          | Lower Bound              | Upper Bound |            |                        |          | Lower Bound              | Upper Bound |
| <b>Acinetobacter</b>          | 0.56         | 0.29                   | 0.43     | -0.25                    | 1.37        | 0.38       | 0.30                   | 0.53     | -0.38                    | 1.14        |
| <b>Actinobacillus</b>         | 18.34        | 6.03                   | 182.03   | 1.59                     | 35.09       | 28.20      | 3.58                   | 76.93    | 18.99                    | 37.40       |
| <b>Actinomyces</b>            | 0.18         | 0.07                   | 0.03     | -0.03                    | 0.39        | 1.41       | 0.71                   | 3.06     | -0.43                    | 3.24        |
| <b>Aggregatibacter</b>        | 0.23         | 0.21                   | 0.23     | -0.36                    | 0.82        | 0.55       | 0.45                   | 1.23     | -0.36                    | 0.82        |
| <b>Allobaculum</b>            | 0.38         | 0.14                   | 0.10     | -0.01                    | 0.78        | 0.11       | 0.06                   | 0.02     | -0.04                    | 0.25        |
| <b>Barnesiella</b>            | 1.89         | 0.74                   | 2.77     | -0.18                    | 3.95        | 0.15       | 0.03                   | 0.01     | 0.07                     | 0.22        |
| <b>Bifidobacterium</b>        | 0.00         | 0.00                   | 0.00     | -0.01                    | 0.02        | 0.05       | 0.05                   | 0.02     | -0.08                    | 0.19        |
| <b>Campylobacter</b>          | 0.59         | 0.16                   | 0.13     | 0.16                     | 1.03        | 0.40       | 0.35                   | 0.75     | -0.50                    | 1.31        |
| <b>Corynebacterium</b>        | 6.30         | 1.92                   | 18.50    | 0.96                     | 11.64       | 3.23       | 0.79                   | 3.78     | 1.19                     | 5.27        |
| <b>Diaphorobacter</b>         | 0.32         | 0.14                   | 0.10     | -0.07                    | 0.72        | 0.58       | 0.28                   | 0.49     | -0.07                    | 0.72        |
| <b>Haemophilus</b>            | 5.97         | 3.50                   | 61.22    | -3.75                    | 15.68       | 2.47       | 0.90                   | 4.85     | 0.16                     | 4.78        |
| <b>Helicobacter</b>           | 0.63         | 0.27                   | 0.36     | -0.12                    | 1.38        | 0.15       | 0.04                   | 0.01     | 0.05                     | 0.25        |
| <b>Lactobacillus</b>          | 4.80         | 4.19                   | 87.64    | -6.82                    | 16.42       | 0.87       | 0.30                   | 0.56     | 0.08                     | 1.65        |
| <b>Leptotrichia</b>           | 0.00         | 0.00                   | 0.00     | 0.00                     | 0.00        | 0.96       | 0.83                   | 4.10     | -1.16                    | 3.09        |
| <b>Neisseria</b>              | 2.70         | 2.17                   | 23.63    | -3.34                    | 8.73        | 2.19       | 0.97                   | 5.65     | -0.30                    | 4.68        |
| <b>Oscillibacter</b>          | 0.70         | 0.25                   | 0.31     | 0.01                     | 1.39        | 0.17       | 0.05                   | 0.01     | 0.30                     | 5.13        |
| <b>Propionibacterium</b>      | 19.80        | 5.23                   | 136.64   | 5.29                     | 34.32       | 5.13       | 2.12                   | 27.02    | -0.32                    | 10.59       |
| <b>Staphylococcus</b>         | 0.47         | 0.13                   | 0.08     | 0.12                     | 0.82        | 0.30       | 0.09                   | 0.05     | 0.08                     | 0.53        |
| <b>Streptococcus</b>          | 17.15        | 4.73                   | 112.07   | 4.00                     | 30.29       | 45.95      | 2.97                   | 52.87    | 4.00                     | 30.29       |
| <b>unc_Flavobacteriaceae</b>  | 0.81         | 0.29                   | 0.42     | 0.00                     | 1.61        | 1.28       | 0.68                   | 2.80     | -0.47                    | 3.04        |
| <b>unc_Lachnospiraceae</b>    | 5.45         | 2.22                   | 24.61    | -0.71                    | 11.61       | 1.10       | 0.43                   | 1.11     | 0.00                     | 2.21        |
| <b>unc_Neisseriaceae</b>      | 0.56         | 0.29                   | 0.43     | -0.25                    | 1.37        | 0.15       | 0.05                   | 0.02     | 0.01                     | 0.28        |
| <b>unc_Porphyrimonadaceae</b> | 2.65         | 0.92                   | 4.23     | 0.10                     | 5.21        | 0.66       | 0.25                   | 0.36     | 0.03                     | 1.30        |
| <b>unc_Ruminococcaceae</b>    | 0.89         | 0.17                   | 0.15     | 0.41                     | 1.38        | 0.28       | 0.12                   | 0.08     | -0.01                    | 0.58        |

(B)

|                               | 15_tissue n=3 |                        |          |                          |             | 15_swab n=7 |                        |          |                          |             |
|-------------------------------|---------------|------------------------|----------|--------------------------|-------------|-------------|------------------------|----------|--------------------------|-------------|
|                               | Mean          | Std. Deviation of mean | Variance | 95% confidence intervals |             | Mean        | Std. Deviation of mean | Variance | 95% confidence intervals |             |
|                               |               |                        |          | Lower Bound              | Upper Bound |             |                        |          | Lower Bound              | Upper Bound |
| <b>Acinetobacter</b>          | 0.14          | 0.06                   | 0.01     | -0.11                    | 0.39        | 0.25        | 0.05                   | 0.02     | 0.12                     | 0.37        |
| <b>Actinobacillus</b>         | 9.73          | 3.55                   | 37.78    | -5.54                    | 25.00       | 5.64        | 0.84                   | 4.93     | 3.58                     | 7.69        |
| <b>Actinomyces</b>            | 5.31          | 2.21                   | 14.69    | -4.21                    | 14.83       | 9.61        | 1.91                   | 25.48    | 4.94                     | 14.28       |
| <b>Aggregatibacter</b>        | 12.87         | 5.66                   | 95.94    | -11.46                   | 37.20       | 8.17        | 2.46                   | 42.24    | 2.16                     | 14.18       |
| <b>Allobaculum</b>            | 1.01          | 0.42                   | 0.52     | -0.79                    | 2.80        | 0.16        | 0.05                   | 0.02     | 0.03                     | 0.30        |
| <b>Barnesiella</b>            | 1.31          | 0.76                   | 1.71     | -1.94                    | 4.56        | 0.14        | 0.06                   | 0.03     | -0.01                    | 0.29        |
| <b>Bifidobacterium</b>        | 0.08          | 0.07                   | 0.02     | -0.24                    | 0.39        | 0.98        | 0.46                   | 1.45     | -0.14                    | 2.09        |
| <b>Campylobacter</b>          | 1.27          | 1.05                   | 3.34     | -3.27                    | 5.81        | 0.14        | 0.05                   | 0.02     | 0.01                     | 0.27        |
| <b>Corynebacterium</b>        | 6.43          | 1.08                   | 3.51     | 1.78                     | 11.09       | 1.35        | 0.27                   | 0.50     | 0.69                     | 2.00        |
| <b>Diaphorobacter</b>         | 0.01          | 0.01                   | 0.00     | -0.02                    | 0.04        | 0.14        | 0.12                   | 0.10     | -0.15                    | 0.43        |
| <b>Haemophilus</b>            | 12.66         | 10.31                  | 318.80   | -31.69                   | 57.01       | 0.46        | 0.13                   | 0.12     | 0.13                     | 0.78        |
| <b>Helicobacter</b>           | 0.23          | 0.15                   | 0.07     | -0.41                    | 0.86        | 0.27        | 0.15                   | 0.16     | -0.09                    | 0.64        |
| <b>Lactobacillus</b>          | 4.71          | 1.28                   | 4.95     | -0.81                    | 10.24       | 2.07        | 0.88                   | 5.40     | -0.08                    | 4.22        |
| <b>Leptotrichia</b>           | 0.08          | 0.08                   | 0.02     | -0.25                    | 0.40        | 0.00        | 0.00                   | 0.00     | 0.00                     | 0.00        |
| <b>Neisseria</b>              | 20.28         | 8.90                   | 237.37   | -18.00                   | 58.55       | 43.37       | 5.80                   | 235.44   | 29.18                    | 57.56       |
| <b>Oscillibacter</b>          | 0.22          | 0.15                   | 0.07     | -0.43                    | 0.88        | 0.18        | 0.14                   | 0.13     | -0.16                    | 0.51        |
| <b>Propionibacterium</b>      | 4.45          | 1.78                   | 9.53     | -3.22                    | 12.12       | 7.83        | 2.41                   | 40.71    | 1.93                     | 13.73       |
| <b>Staphylococcus</b>         | 0.07          | 0.03                   | 0.00     | -0.06                    | 0.20        | 0.08        | 0.04                   | 0.01     | -0.03                    | 0.18        |
| <b>Streptococcus</b>          | 10.99         | 1.98                   | 11.77    | 2.47                     | 19.51       | 14.82       | 3.74                   | 98.07    | 5.66                     | 23.98       |
| <b>unc_Flavobacteriaceae</b>  | 1.27          | 0.24                   | 0.17     | 0.25                     | 2.29        | 0.33        | 0.11                   | 0.08     | 0.06                     | 0.59        |
| <b>unc_Lachnospiraceae</b>    | 0.97          | 0.41                   | 0.51     | -0.80                    | 2.74        | 0.65        | 0.27                   | 0.51     | 0.00                     | 1.31        |
| <b>unc_Neisseriaceae</b>      | 0.08          | 0.05                   | 0.01     | -0.12                    | 0.27        | 0.15        | 0.10                   | 0.07     | -0.09                    | 0.40        |
| <b>unc_Porphyrimonadaceae</b> | 2.98          | 1.21                   | 4.38     | -2.22                    | 8.18        | 0.33        | 0.15                   | 0.15     | -0.03                    | 0.69        |
| <b>unc_Ruminococcaceae</b>    | 0.17          | 0.04                   | 0.00     | 0.01                     | 0.33        | 0.24        | 0.05                   | 0.02     | 0.11                     | 0.37        |

**Table S1.** Descriptive statistics from the bacterial genera present in higher abundances in the mice oral samples, at 2 months of age (A) and 15 months of age (B).
